# Supplementary material for: Evaluation of NO + reagent ion chemistry for online measurements ofatmospheric volatile organic compounds
Source: Copernicus journal article supplement (doi:10.5194/amt-9-2909-2016), 2016-07-08
Supplement: Supplementary file 1 [file amt-9-2909-2016-supplement.pdf]

Supplement of Atmos. Meas. Tech., 9, 2909–2925, 2016  
<http://www.atmos-meas-tech.net/9/2909/2016/>  
doi:10.5194/amt-9-2909-2016-supplement  
© Author(s) 2016. CC Attribution 3.0 License.

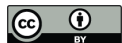

*Supplement of*

## **Evaluation of $\text{NO}^+$ reagent ion chemistry for online measurements of atmospheric volatile organic compounds**

**Abigail R. Koss et al.**

*Correspondence to:* Abigail R. Koss ([abigail.koss@noaa.gov](mailto:abigail.koss@noaa.gov))

The copyright of individual parts of the supplement might differ from the CC-BY 3.0 licence.

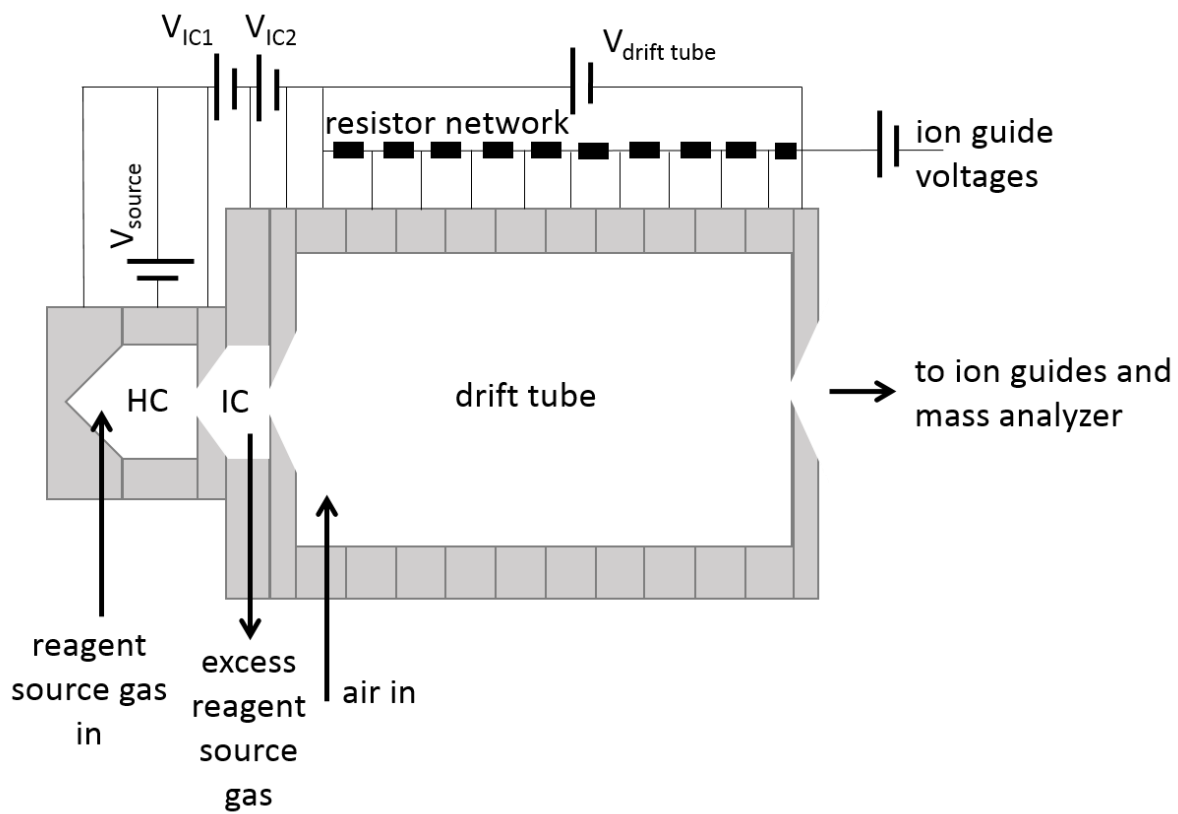

Figure S1. Ion source and drift tube schematic.

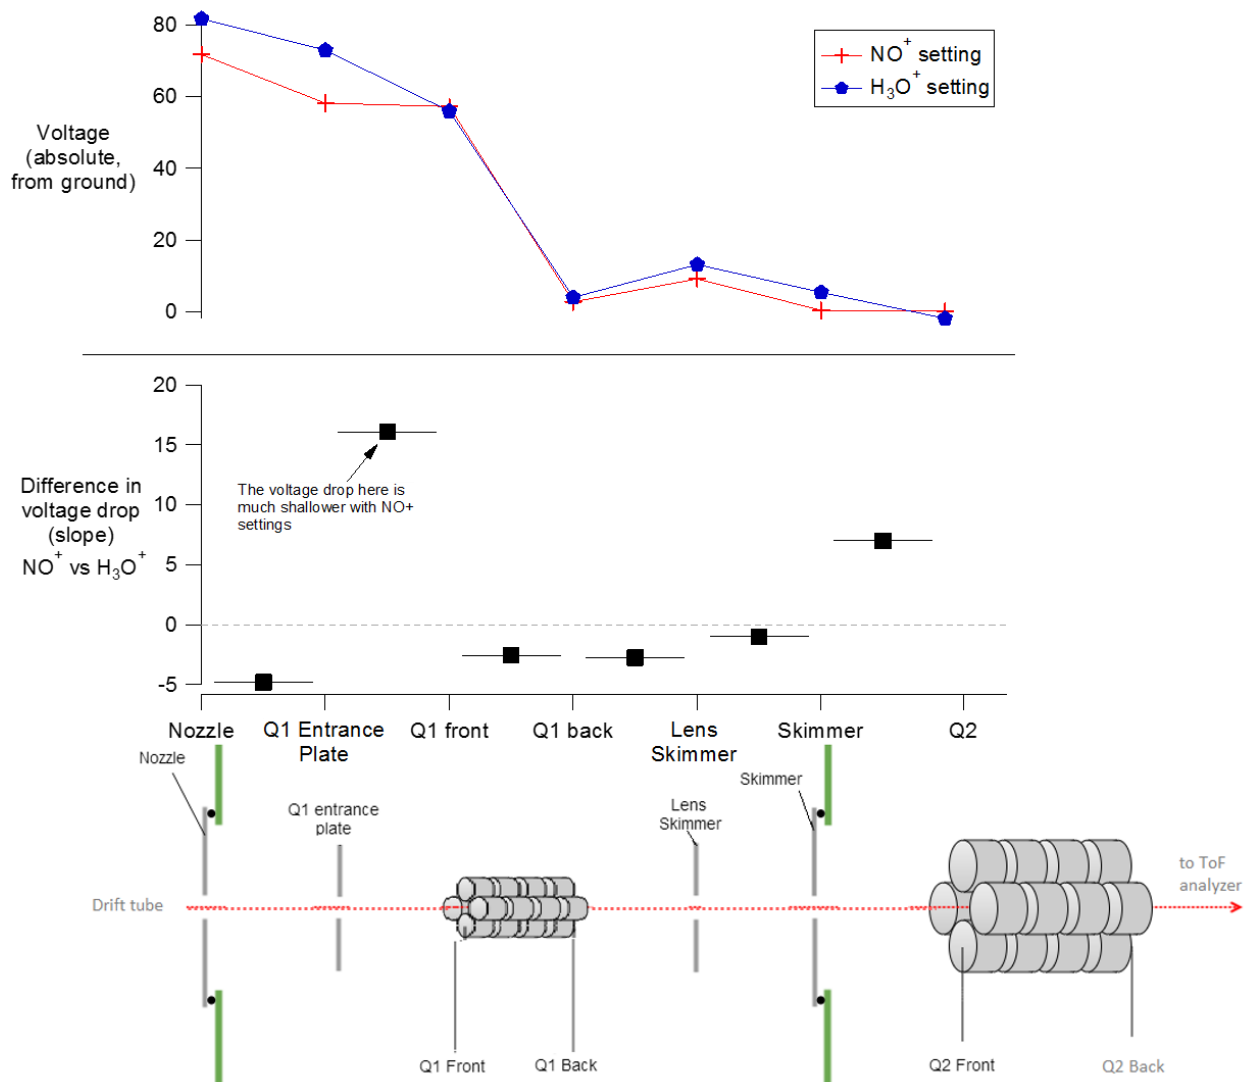

Figure S2. Ion guide voltage settings. The top panel shows the absolute voltage setting (from ground); the middle panel highlights the changes in voltage potential between H<sub>3</sub>O<sup>+</sup> and NO<sup>+</sup> settings, and the bottom panel is a cartoon of the ion guide section taken from the CI-API manual (Aerodyne Inc./Tofwerk AG). The horizontal (axial) distances are not to scale.

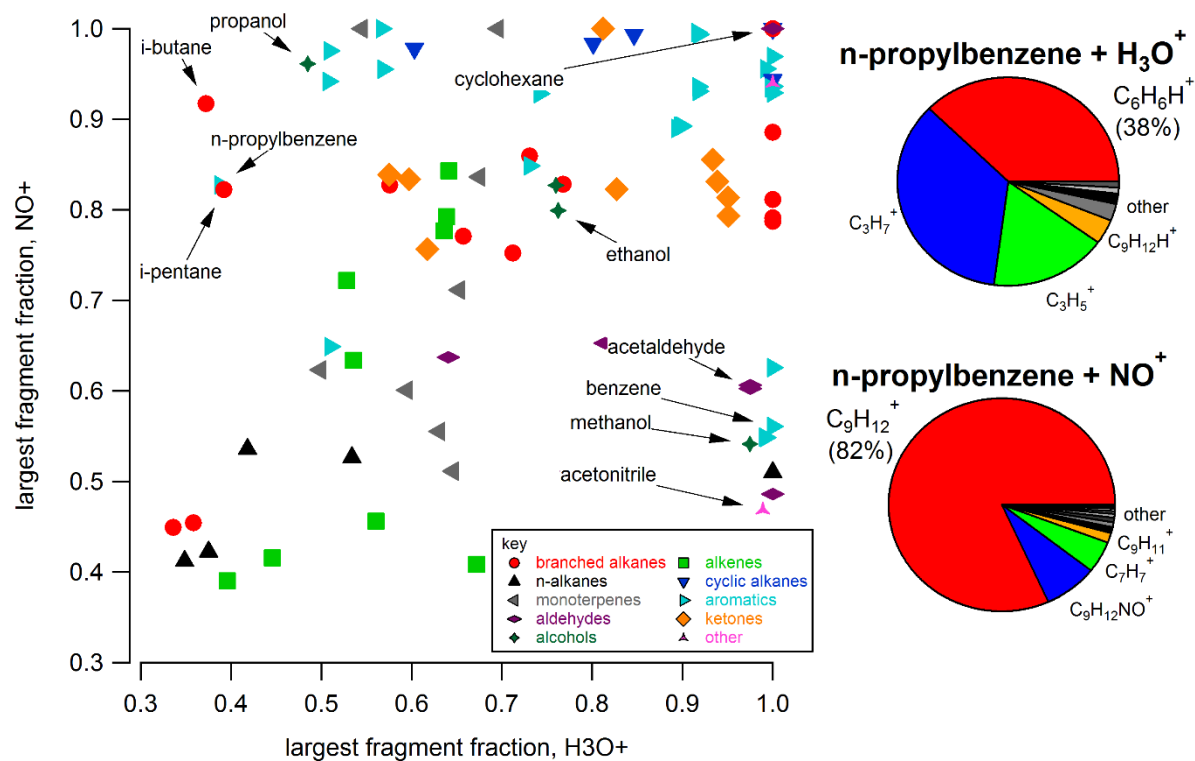

Figure S3. Comparison of product ion distributions between  $\text{NO}^+$  CIMS and  $\text{H}_3\text{O}^+$  CIMS. The complete product ion distribution of n-propylbenzene is shown as an example of a compound with a complex mass spectrum resulting from  $\text{H}_3\text{O}^+$  chemistry, and a simple mass spectrum resulting from  $\text{NO}^+$  chemistry.

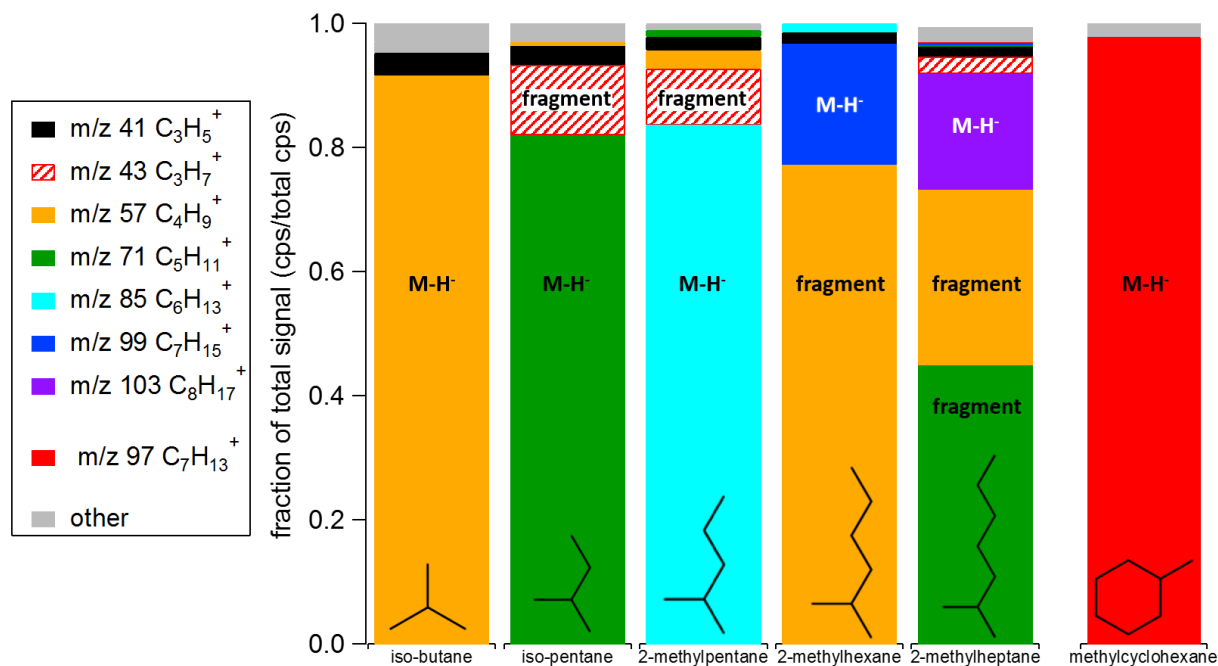

Figure S4. Product ion distributions of selected aliphatic hydrocarbons, at a relative humidity of 20%.

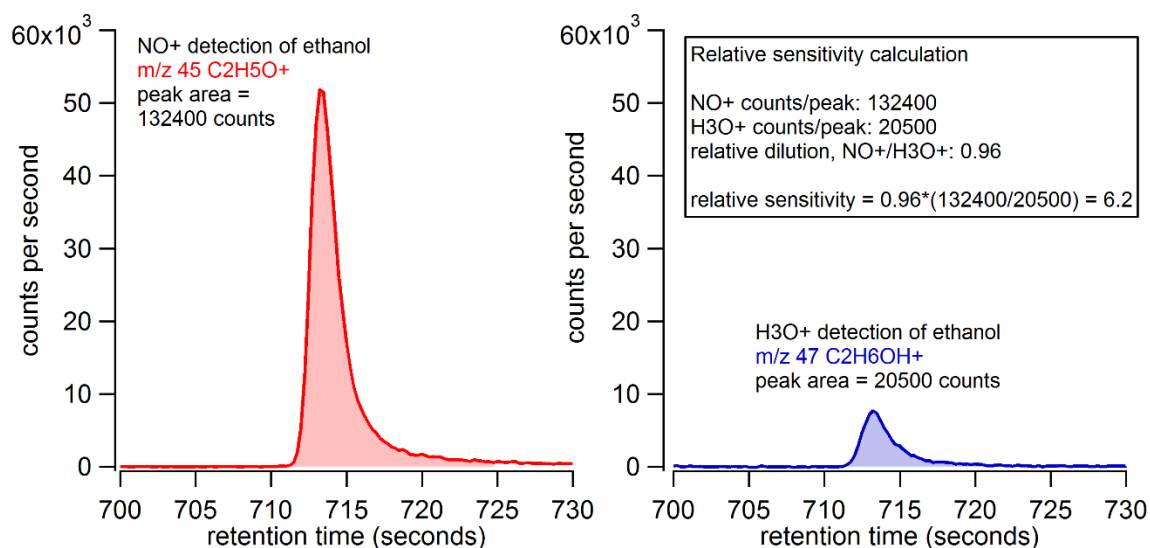

Figure S5. Example chromatograms and relative sensitivity calculation of ethanol for Table 2.

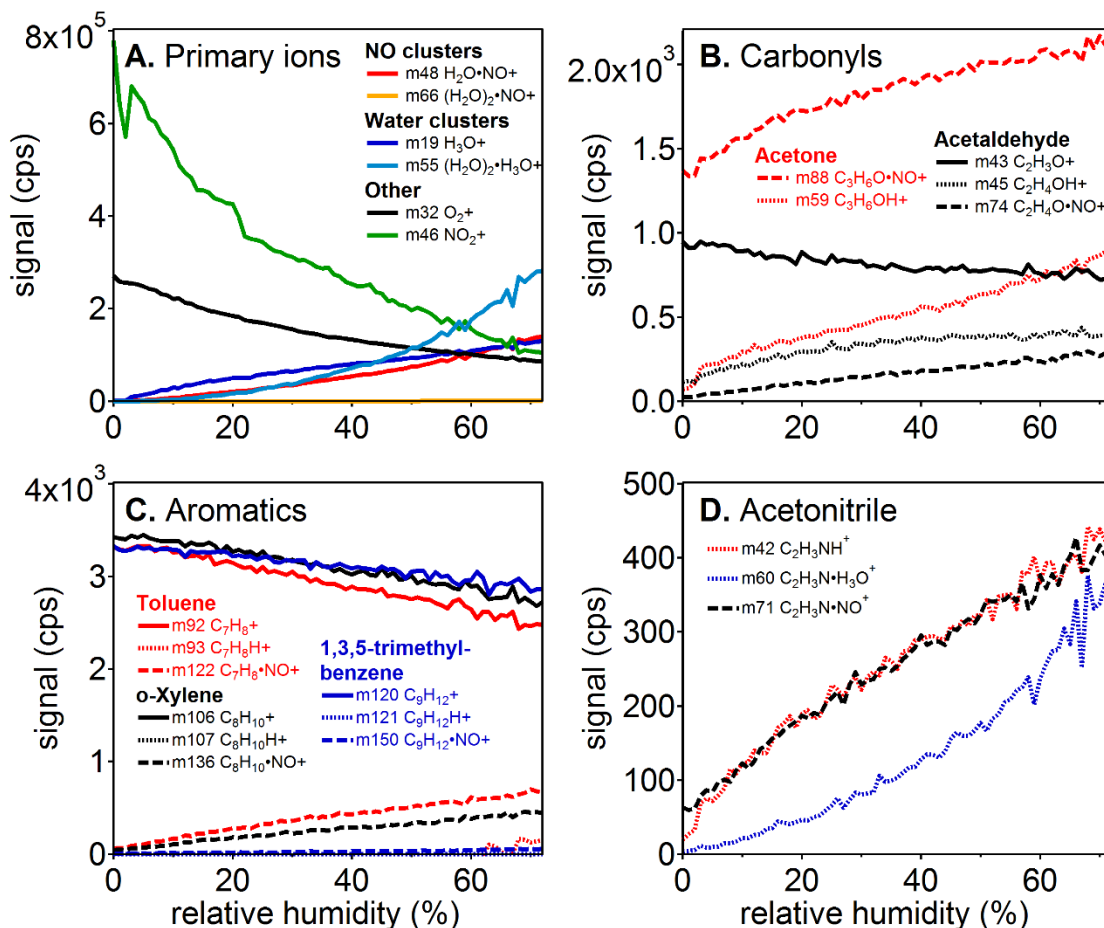

Figure S6. Humidity dependence of primary ions and VOCs. (a) Impurity ions and water clusters. (b) Carbonyls. (c) Aromatics. (d) Acetonitrile. Acetonitrile is detected with poor sensitivity using NO<sup>+</sup>; the NO<sup>+</sup> and H<sub>3</sub>O<sup>+</sup> products are approximately equal in magnitude.

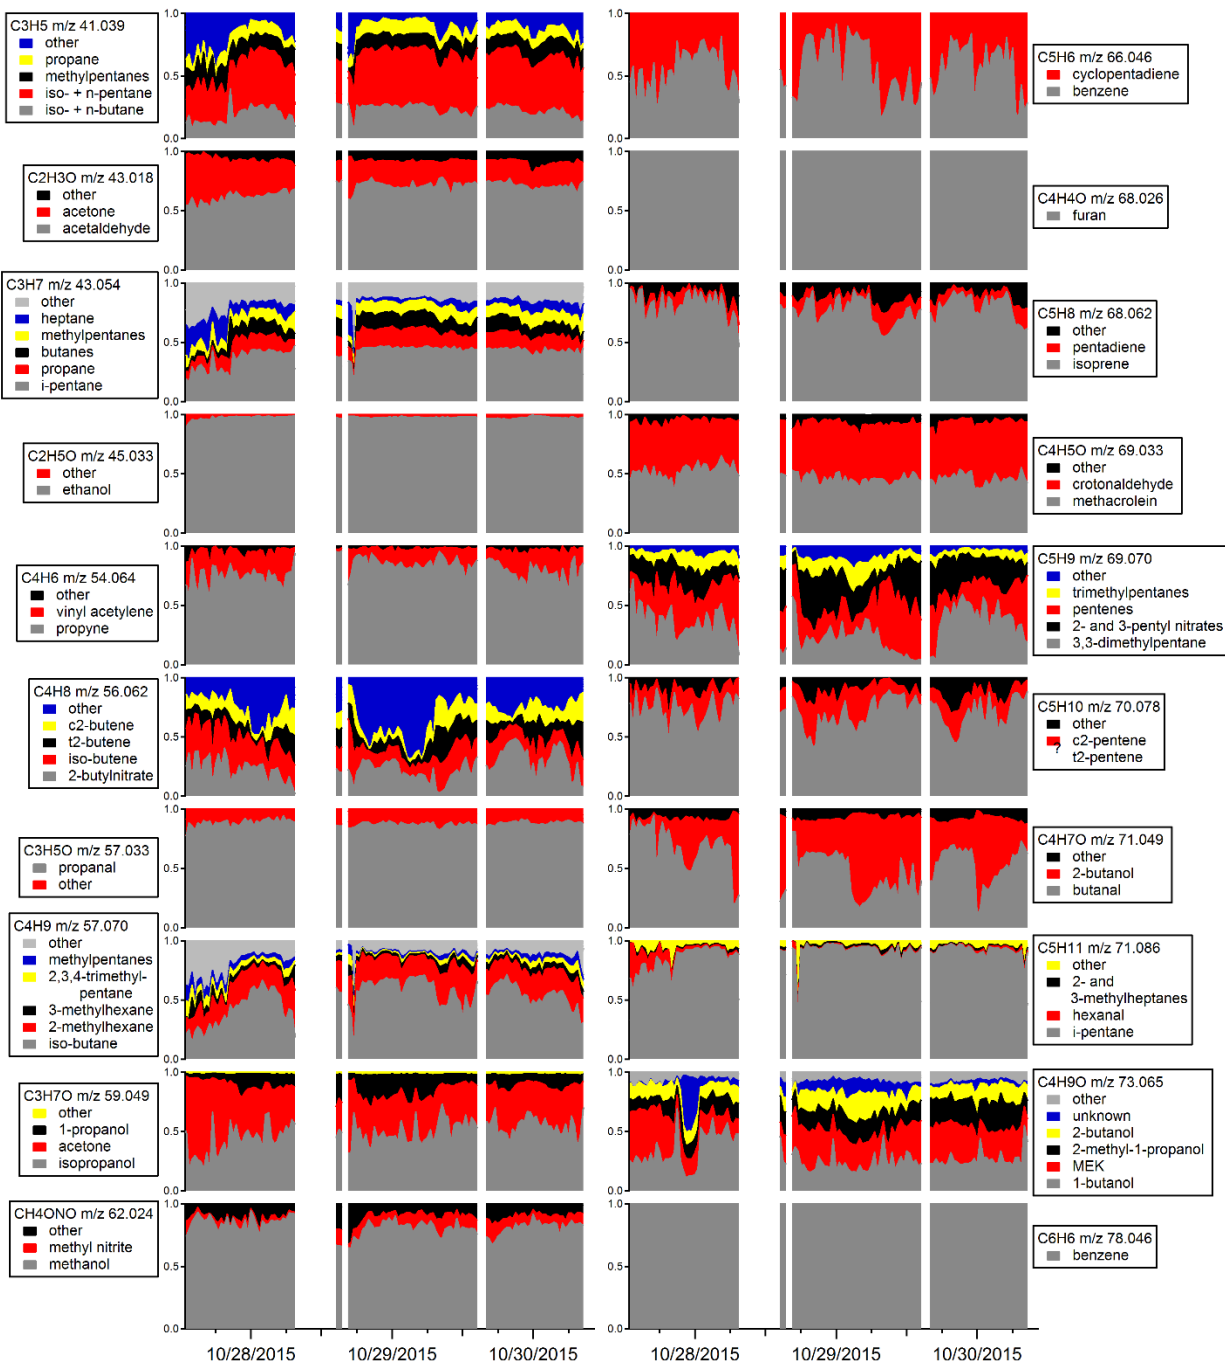

Figure S7. Speciated contributions to various  $\text{NO}^+$  CIMS masses, in urban air. Values on Y-axes are the fractional contribution of each VOC to total signal. Includes m/z 41-m/z 78.

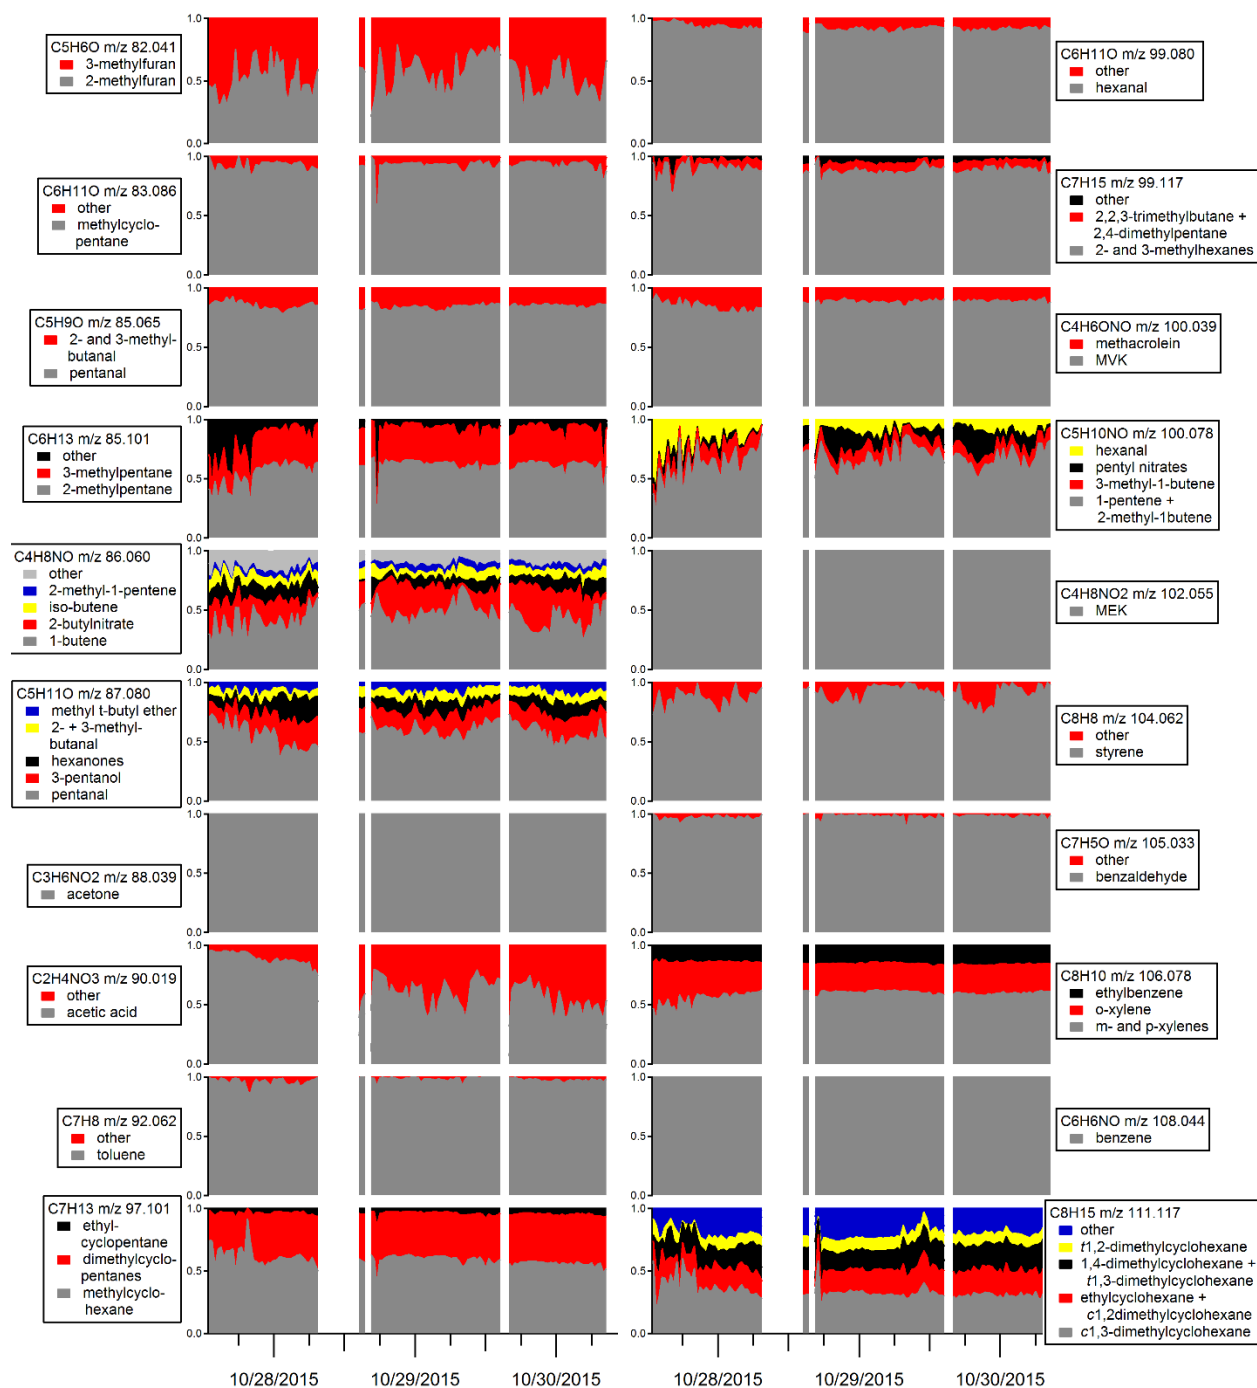

Figure S8. Figure S7, continued. Includes m/z 82-m/z 111.

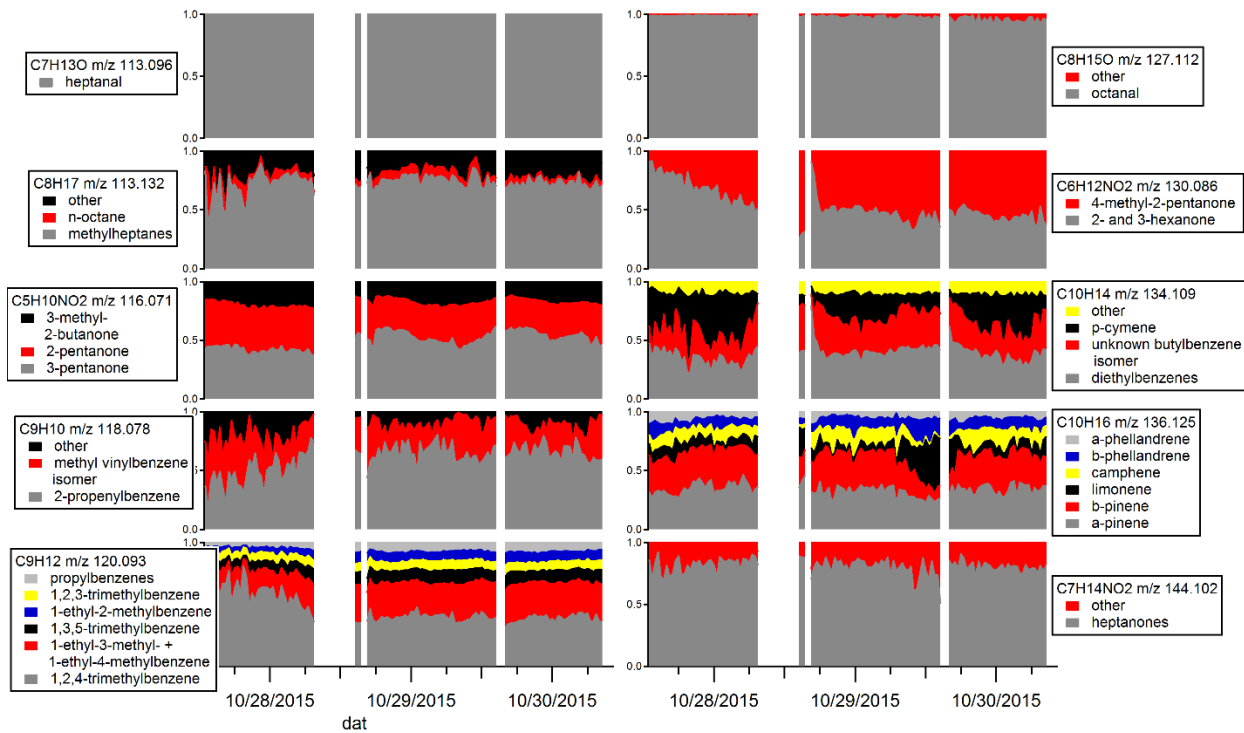

Figure S9. Figure S7, continued. Includes m/z 113-m/z 144.



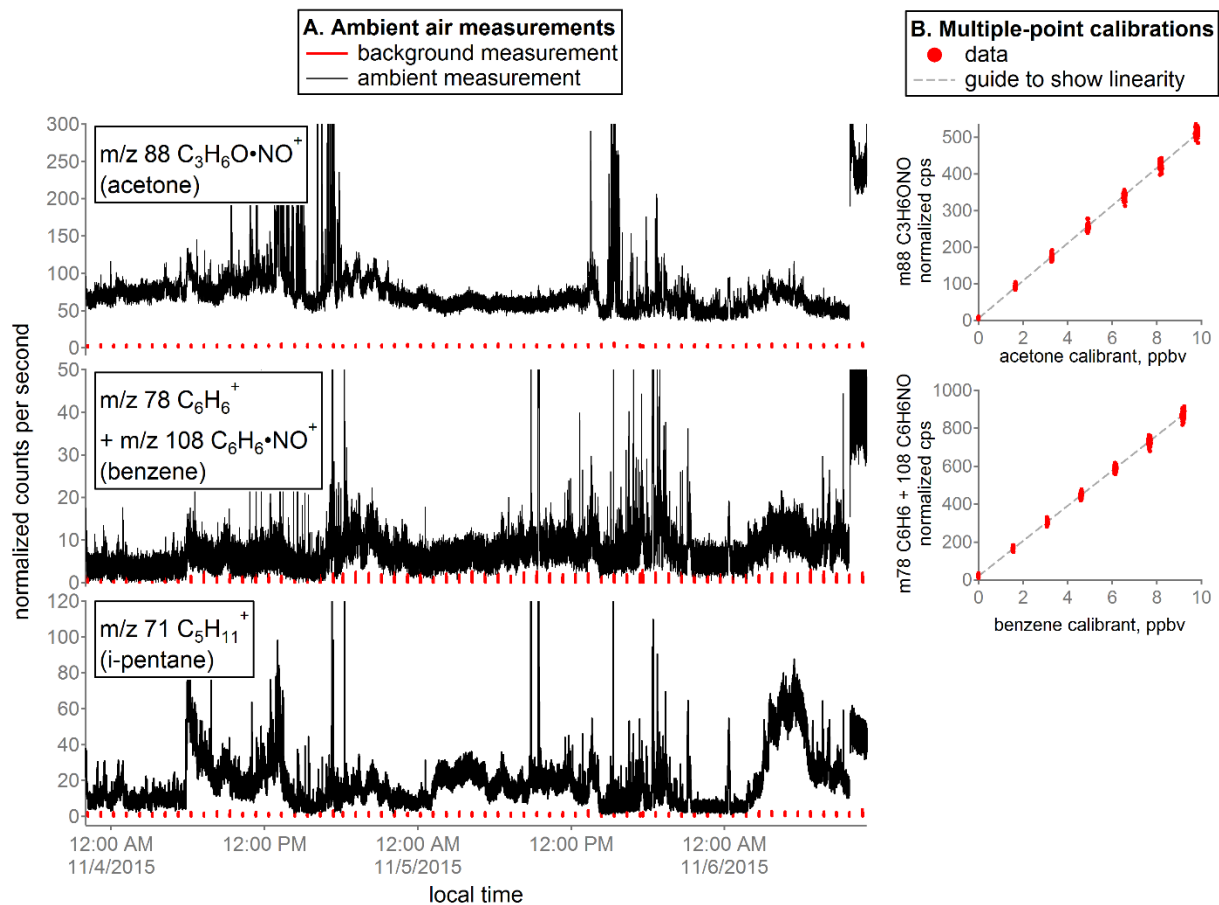

Figure S10. A. Background and ambient measurements taken during urban air sampling with the  $NO^+$  ToF-CIMS. B. Example multiple-point calibrations of the  $NO^+$  ToF-CIMS showing sensitivity linear with concentration.

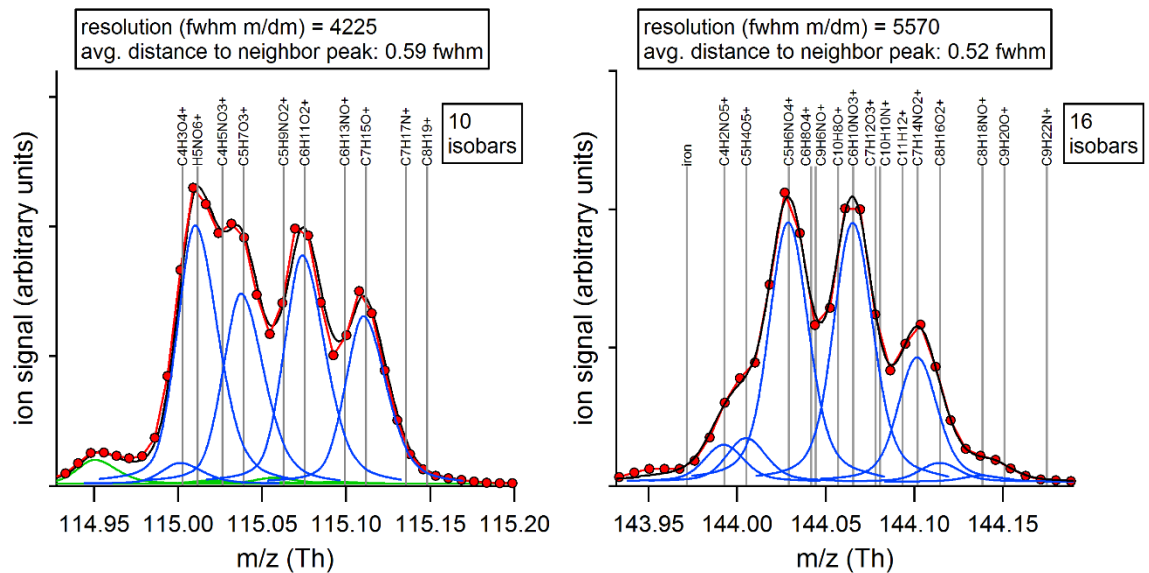

Figure S11. Example isobaric interferences for heptanone measured with  $\text{H}_3\text{O}^+$  CIMS, at  $m/z$  115  $\text{C}_7\text{H}_{14}\text{OH}^+$ , and with  $\text{NO}^+$  CIMS, at  $m/z$  144  $\text{C}_7\text{H}_{14}\text{ONO}^+$ . Although the resolution  $m/dm$  is better at  $m/z$  144, there are more possible isobaric interferences and the average distance to neighboring peaks is smaller. The  $m/z$  range of each window is 10 FWHM.  $\text{H}_3\text{O}^+$  ToF-CIMS mass spectrum courtesy of M. Coggon, collected in Boulder, CO in Dec. 2015.

Table S1. VOCs sampled in series GC-ToFCIMS laboratory experiments.

| <b>VOC name</b>              | <b>Formula</b>                  |                                                   |                                  |
|------------------------------|---------------------------------|---------------------------------------------------|----------------------------------|
| <b>alkanes</b>               |                                 | $\beta$ -pinene                                   | C <sub>10</sub> H <sub>16</sub>  |
| ethane                       | C <sub>2</sub> H <sub>6</sub>   | limonene                                          | C <sub>10</sub> H <sub>16</sub>  |
| propane                      | C <sub>3</sub> H <sub>8</sub>   | camphene                                          | C <sub>10</sub> H <sub>16</sub>  |
| n-butane                     | C <sub>4</sub> H <sub>10</sub>  | $\gamma$ -terpinene                               | C <sub>10</sub> H <sub>16</sub>  |
| n-pentane                    | C <sub>5</sub> H <sub>12</sub>  | $\alpha$ -phellandrene                            | C <sub>10</sub> H <sub>16</sub>  |
| n-hexane                     | C <sub>6</sub> H <sub>14</sub>  | 1,8-cineol                                        | C <sub>10</sub> H <sub>16</sub>  |
| n-octane                     | C <sub>8</sub> H <sub>18</sub>  | 3-carene + myrcene                                | C <sub>10</sub> H <sub>16</sub>  |
| n-decane                     | C <sub>10</sub> H <sub>22</sub> | <b>aromatics</b>                                  |                                  |
| n-undecane                   | C <sub>12</sub> H <sub>26</sub> | benzene                                           | C <sub>6</sub> H <sub>6</sub>    |
| i-butane (2-methylpropane)   | C <sub>4</sub> H <sub>10</sub>  | toluene                                           | C <sub>7</sub> H <sub>8</sub>    |
| i-pentane (2-methylbutane)   | C <sub>5</sub> H <sub>12</sub>  | ethylbenzene                                      | C <sub>8</sub> H <sub>10</sub>   |
| 2,2-dimethylbutane           | C <sub>6</sub> H <sub>14</sub>  | m-xylene + p-xylene                               | C <sub>8</sub> H <sub>10</sub>   |
| 2-methylpentane              | C <sub>6</sub> H <sub>14</sub>  | o-xylene                                          | C <sub>8</sub> H <sub>10</sub>   |
| 2,3-dimethylbutane           | C <sub>6</sub> H <sub>14</sub>  | vinylbenzene (styrene)                            | C <sub>8</sub> H <sub>8</sub>    |
| 3-methylpentane              | C <sub>6</sub> H <sub>14</sub>  | isopropylbenzene                                  | C <sub>9</sub> H <sub>12</sub>   |
| 2,4-dimethylpentane          | C <sub>7</sub> H <sub>16</sub>  | n-propylbenzene                                   | C <sub>9</sub> H <sub>12</sub>   |
| 2-methylhexane               | C <sub>7</sub> H <sub>16</sub>  | 1-ethyl,3-methylbenzene + 1-ethyl,4-methylbenzene | C <sub>9</sub> H <sub>12</sub>   |
| 2,3-dimethylpentane          | C <sub>7</sub> H <sub>16</sub>  | 1,3,5-trimethylbenzene                            | C <sub>9</sub> H <sub>12</sub>   |
| 3,3-dimethylpentane          | C <sub>7</sub> H <sub>16</sub>  | 1-ethyl,2-methylbenzene                           | C <sub>9</sub> H <sub>12</sub>   |
| 3-methylhexane               | C <sub>7</sub> H <sub>16</sub>  | 1,2,4-trimethylbenzene                            | C <sub>9</sub> H <sub>12</sub>   |
| 2,2,4-trimethylpentane       | C <sub>8</sub> H <sub>18</sub>  | 1,2,3-trimethylbenzene                            | C <sub>9</sub> H <sub>12</sub>   |
| 2,3,4-trimethylpentane       | C <sub>8</sub> H <sub>18</sub>  | 1,3-diethylbenzene                                | C <sub>10</sub> H <sub>14</sub>  |
| 2-methylheptane              | C <sub>8</sub> H <sub>18</sub>  | 1,4-diethylbenzene                                | C <sub>10</sub> H <sub>14</sub>  |
| 3-methylheptane              | C <sub>8</sub> H <sub>18</sub>  | <b>aldehydes</b>                                  |                                  |
| 4-methylheptane              | C <sub>8</sub> H <sub>18</sub>  | acetaldehyde                                      | C <sub>2</sub> H <sub>4</sub> O  |
| <b>alkenes</b>               |                                 | propanal                                          | C <sub>3</sub> H <sub>6</sub> O  |
| ethene                       | C <sub>2</sub> H <sub>4</sub>   | butanal                                           | C <sub>4</sub> H <sub>8</sub> O  |
| propene                      | C <sub>3</sub> H <sub>6</sub>   | pentanal                                          | C <sub>5</sub> H <sub>10</sub> O |
| ethyne                       | C <sub>2</sub> H <sub>2</sub>   | hexanal                                           | C <sub>6</sub> H <sub>12</sub> O |
| trans-2-butene               | C <sub>4</sub> H <sub>8</sub>   | heptanal                                          | C <sub>7</sub> H <sub>14</sub> O |
| 1-butene                     | C <sub>4</sub> H <sub>8</sub>   | octanal                                           | C <sub>8</sub> H <sub>16</sub> O |
| iso-butene (2-methylpropene) | C <sub>4</sub> H <sub>8</sub>   | methacrolein                                      | C <sub>4</sub> H <sub>6</sub> O  |
| cis-2-butene                 | C <sub>4</sub> H <sub>8</sub>   | <b>ketones</b>                                    |                                  |
| 1-pentene                    | C <sub>5</sub> H <sub>10</sub>  | acetone                                           | C <sub>3</sub> H <sub>6</sub> O  |
| trans-2-pentene              | C <sub>5</sub> H <sub>10</sub>  | 2-butanone (MEK)                                  | C <sub>4</sub> H <sub>8</sub> O  |
| cis-2-pentene                | C <sub>5</sub> H <sub>10</sub>  | 3-methyl-2-butanone                               | C <sub>5</sub> H <sub>10</sub> O |
| 1-hexene                     | C <sub>6</sub> H <sub>12</sub>  | 2-pentanone                                       | C <sub>5</sub> H <sub>10</sub> O |
| isoprene                     | C <sub>5</sub> H <sub>8</sub>   | 3-pentanone                                       | C <sub>5</sub> H <sub>10</sub> O |
| <b>cycloalkanes</b>          |                                 | 3-hexanone                                        | C <sub>6</sub> H <sub>12</sub> O |
| cyclopentane                 | C <sub>5</sub> H <sub>10</sub>  | methyl vinyl ketone (MVK)                         | C <sub>4</sub> H <sub>6</sub> O  |
| methylcyclopentane           | C <sub>6</sub> H <sub>12</sub>  | <b>other</b>                                      |                                  |
| cyclohexane                  | C <sub>6</sub> H <sub>12</sub>  | methanol                                          | CH <sub>4</sub> O                |
| methylcyclohexane            | C <sub>7</sub> H <sub>14</sub>  | ethanol                                           | C <sub>2</sub> H <sub>6</sub> O  |
| ethylcyclohexane             | C <sub>8</sub> H <sub>16</sub>  | 2-propanol                                        | C <sub>3</sub> H <sub>8</sub> O  |
| 1,1-dimethylcyclopentane     | C <sub>7</sub> H <sub>14</sub>  | methyl- <i>t</i> -butyl ether (MTBE)              | C <sub>5</sub> H <sub>12</sub> O |
| ethylcyclopentane            | C <sub>7</sub> H <sub>14</sub>  | acetonitrile                                      | C <sub>2</sub> H <sub>3</sub> N  |
| <b>monoterpenes</b>          |                                 | 3-methylfuran                                     | C <sub>5</sub> H <sub>6</sub> O  |
| $\alpha$ -pinene             | C <sub>10</sub> H <sub>16</sub> |                                                   |                                  |
